# Supplementary figures and images for: Diagnostic accuracy of ultrasound, CT and their combination in detecting cervical lymph node metastasis in patients with papillary thyroid cancer: a systematic review and meta-analysis
Source: HighWire-hosted journal article supplement (doi:10.1136/bmjopen-2021-051568), 2022-07-01

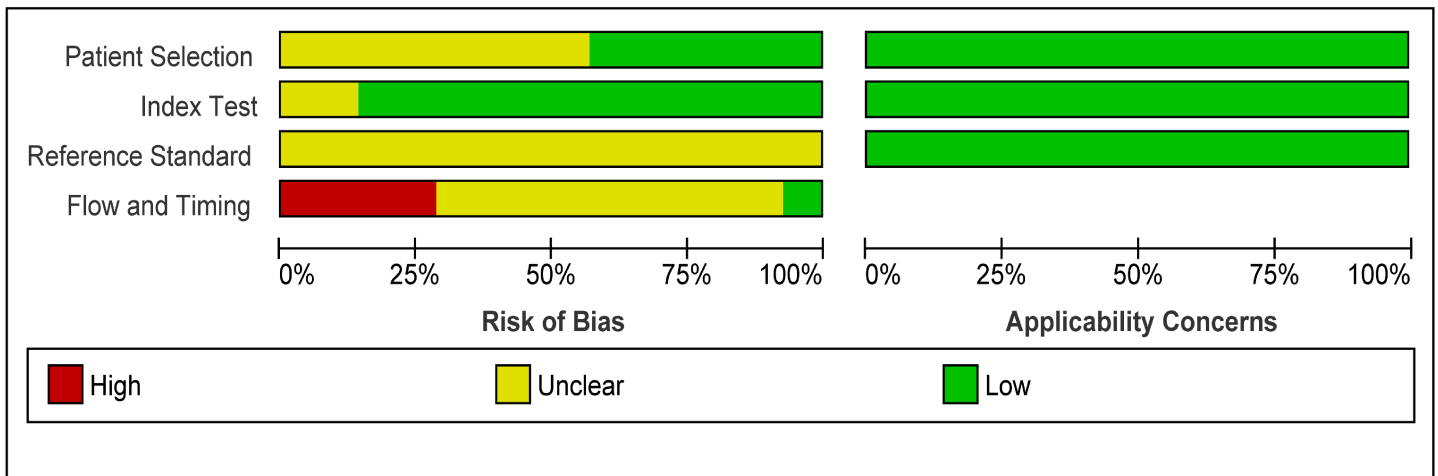

Supplement: bmjopen-2021-051568supp004_data_supplement.pdf [file bmjopen-2021-051568supp004_data_supplement.pdf]

## Central neck level:US

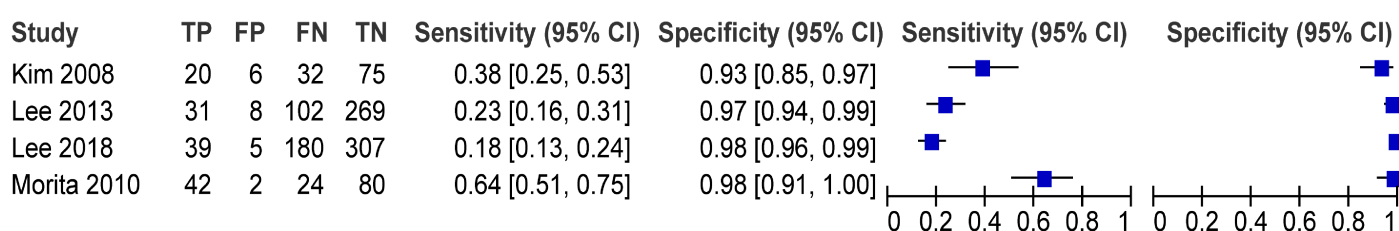

## Central neck level:CT

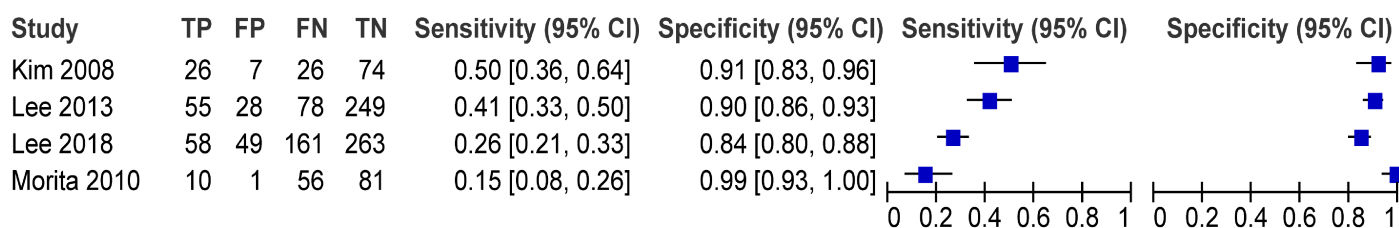

## Central neck level:US/CT

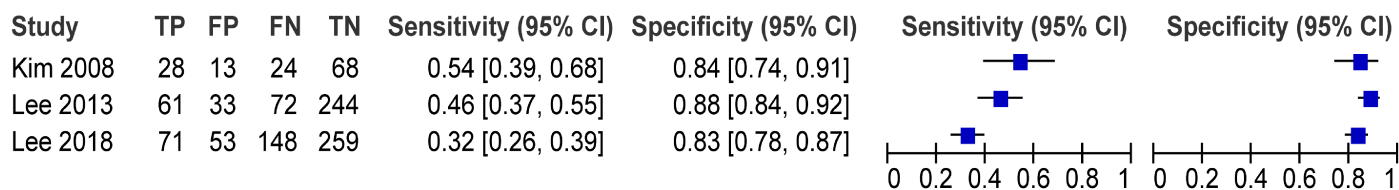

Supplement: bmjopen-2021-051568supp005_data_supplement.pdf [file bmjopen-2021-051568supp005_data_supplement.pdf]

## Central patient level:US

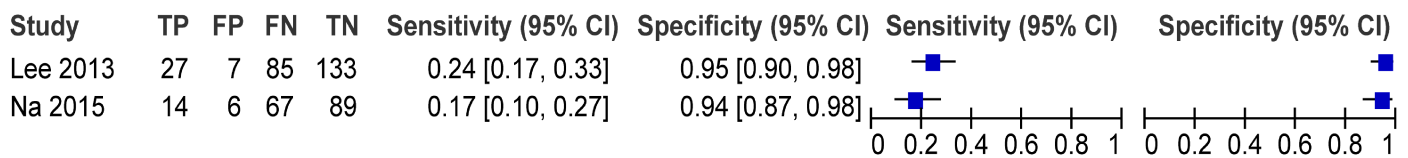

## Central patient level:CT

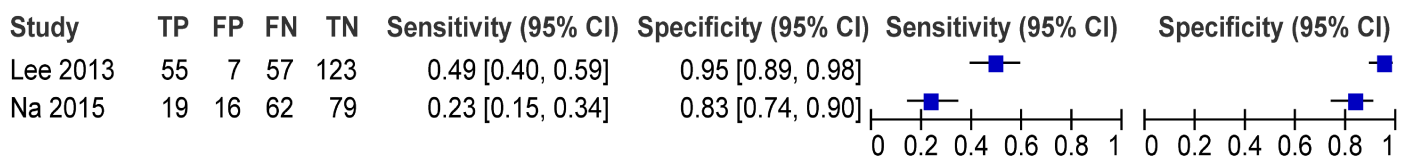

## Central patient level:US/CT

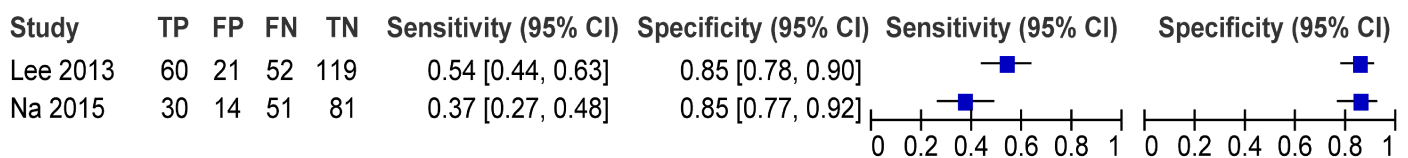

Supplement: bmjopen-2021-051568supp009_data_supplement.pdf [file bmjopen-2021-051568supp009_data_supplement.pdf]

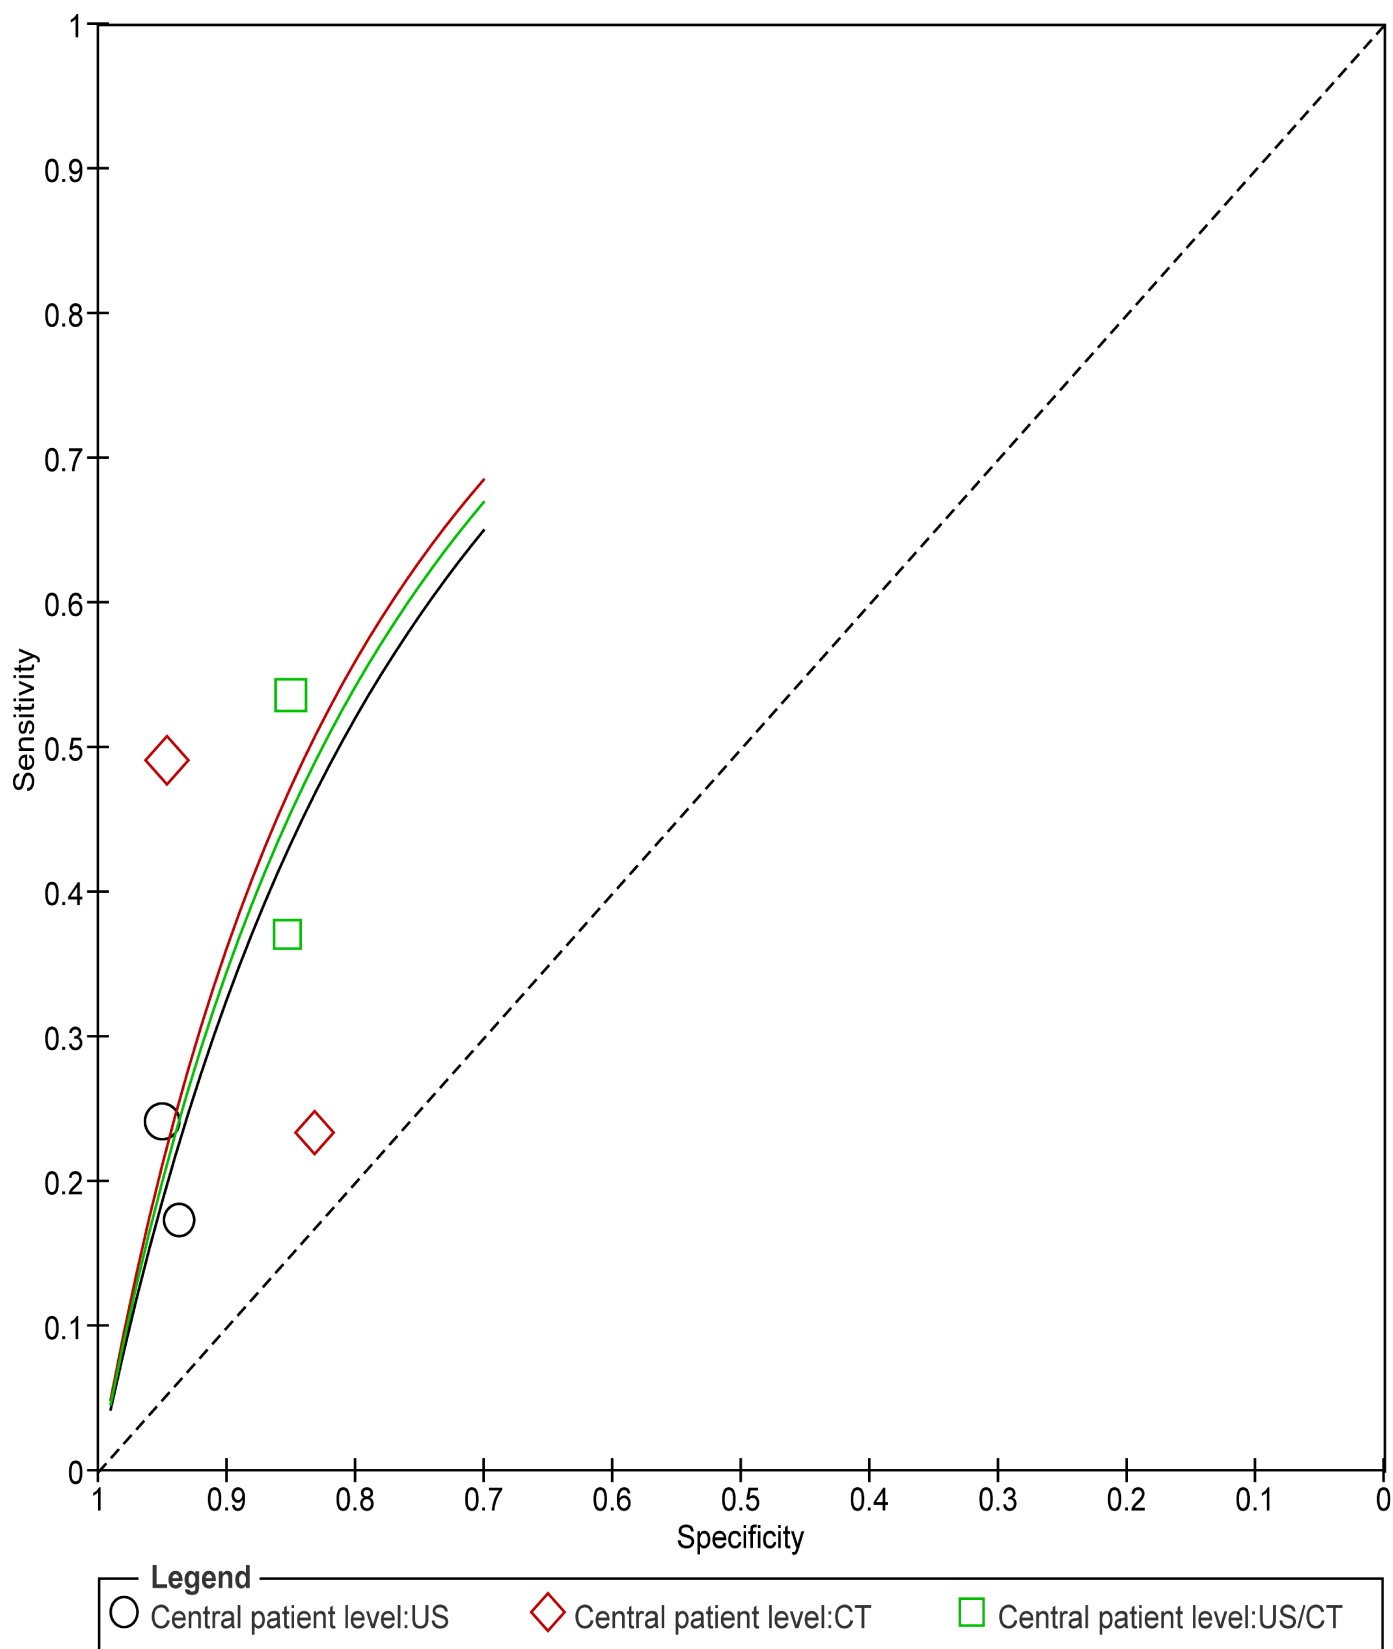

Supplement: bmjopen-2021-051568supp010_data_supplement.pdf [file bmjopen-2021-051568supp010_data_supplement.pdf]
